# Supplementary material for: A versatile two-step method for the reductive alkylation and formal [4 + 2] annulation of secondary lactams: step economical syntheses of the ant venom alkaloids (2R,5S)-2-butyl-5-propylpyrrolidine and (+)-monomorine I
Source: Royal Society of Chemistry journal article supplement (doi:10.1039/c3qo00065f), 2014-01-01

**Electronic Supplementary Information for**

**A Versatile Two-step Method for the Reductive Alkylation and Formal [4 + 2] Annulation of Secondary Lactams: Step Economical Syntheses of the ant venom Alkaloids (2*R*,5*S*)-2-Butyl-5-propylpyrrolidine and (+)-Monomorine I**

Hui-Qiong Deng,<sup>†</sup> Xiang-Yang Qian,<sup>†</sup> Yu-Xiu Li,  
Jian-Feng Zheng,<sup>†</sup> Lin-Feng Xie,<sup>\*,†</sup> and Pei-Qiang Huang<sup>\*,†,‡</sup>

<sup>†</sup>*Department of Chemistry, College of Chemistry and Chemical Engineering, Xiamen University, Xiamen, Fujian 361005, China*

<sup>‡</sup>*State Key Laboratory of Applied Organic Chemistry, Lanzhou University, Lanzhou 730000, China*

E-mail: [pqhuang@xmu.edu.cn](mailto:pqhuang@xmu.edu.cn)

**Contents (11 pages):**

- <sup>1</sup>H and <sup>13</sup>C NMR spectra of compounds **7**, **8**, **10**, **14** ~ **16**, **19** ~ **21** (pp. 2-10)
- <sup>13</sup>C NMR DEPT135 spectrum of compound **10** (pp. 11)

$^1\text{H}$  and  $^{13}\text{C}$  NMR spectra of compound **14**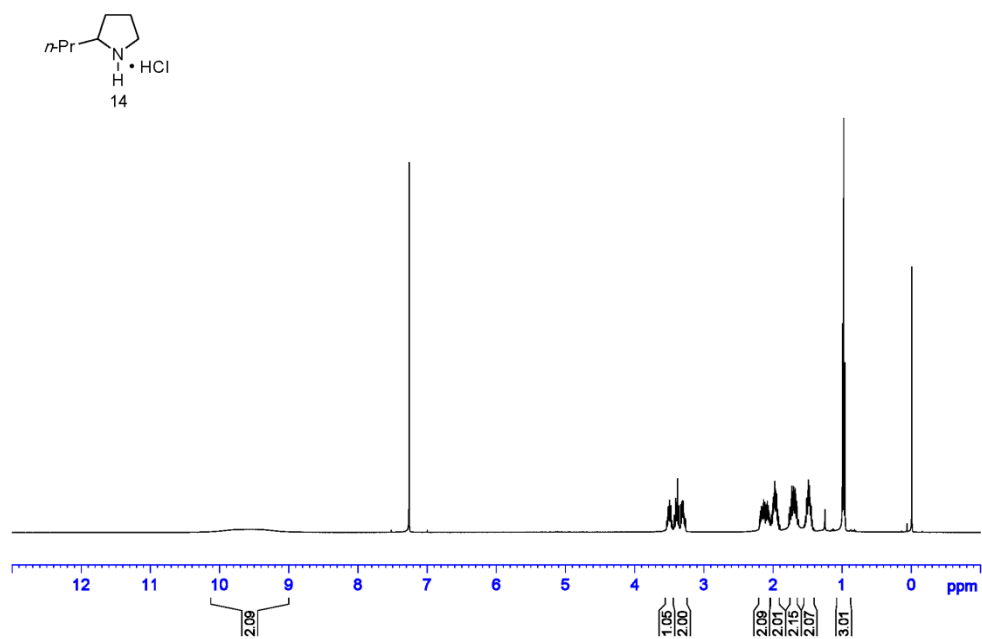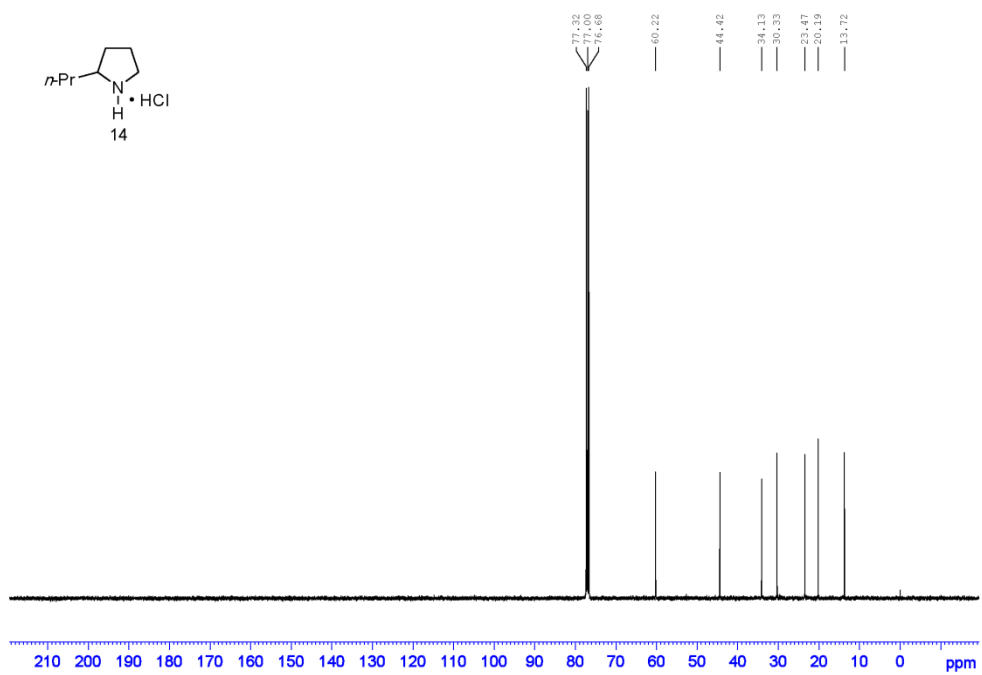

$^1\text{H}$  and  $^{13}\text{C}$  NMR spectra of compound 7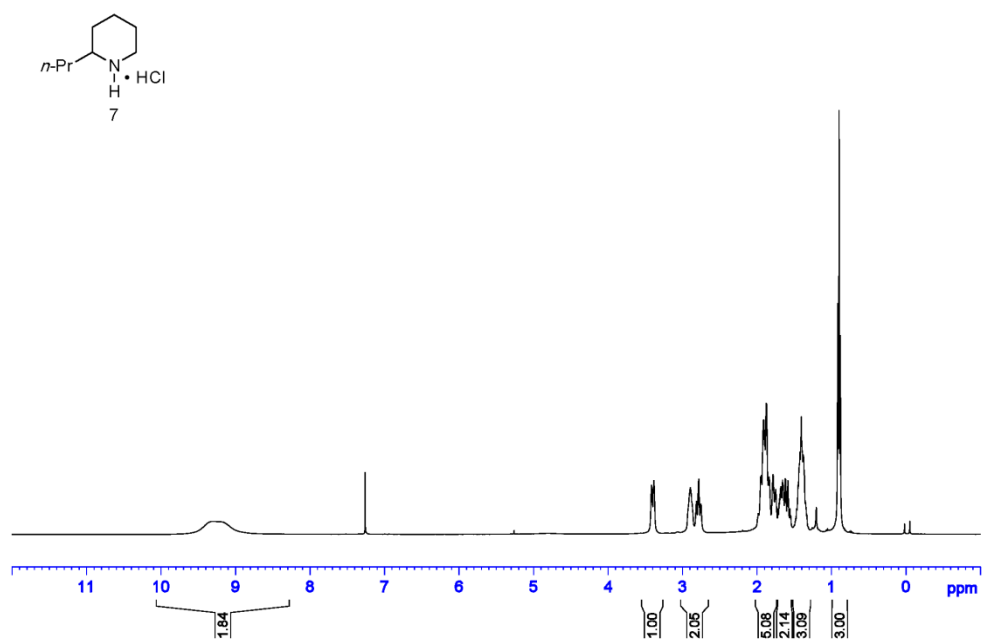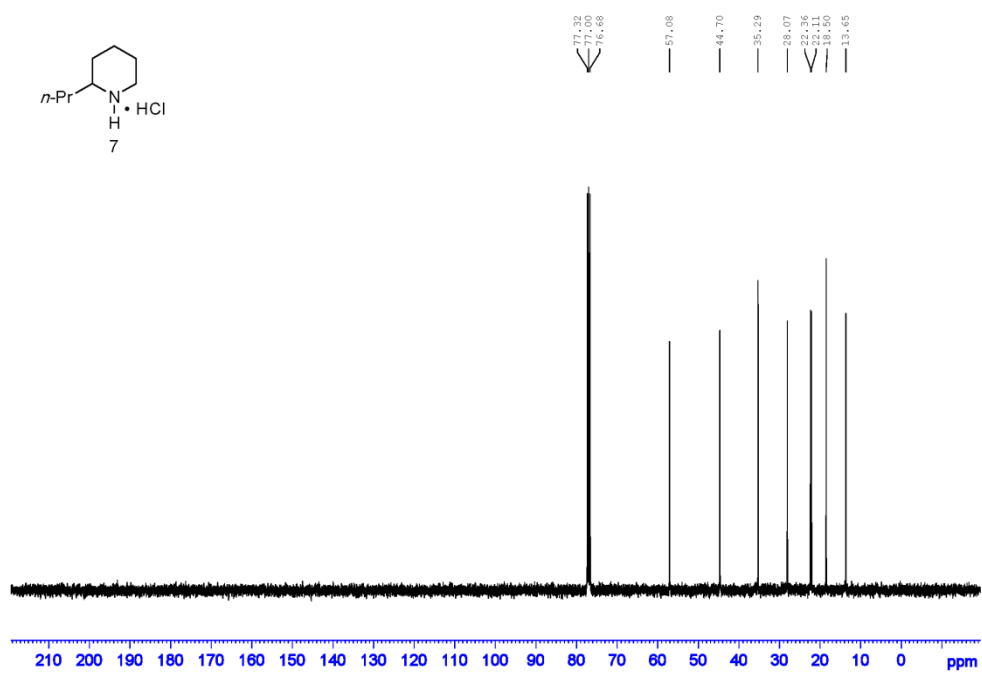

$^1\text{H}$  and  $^{13}\text{C}$  NMR spectra of compound **15**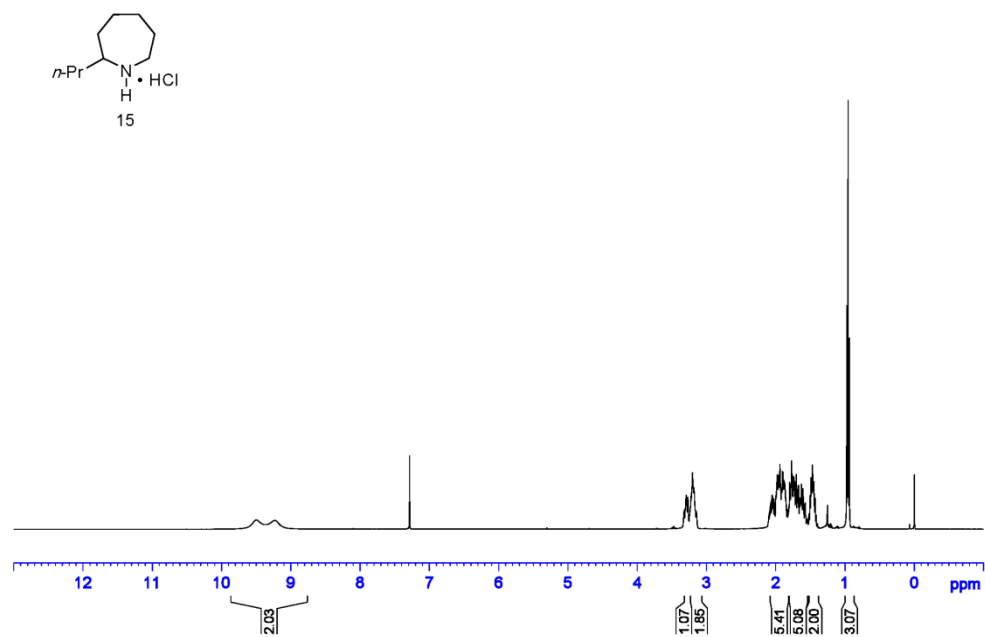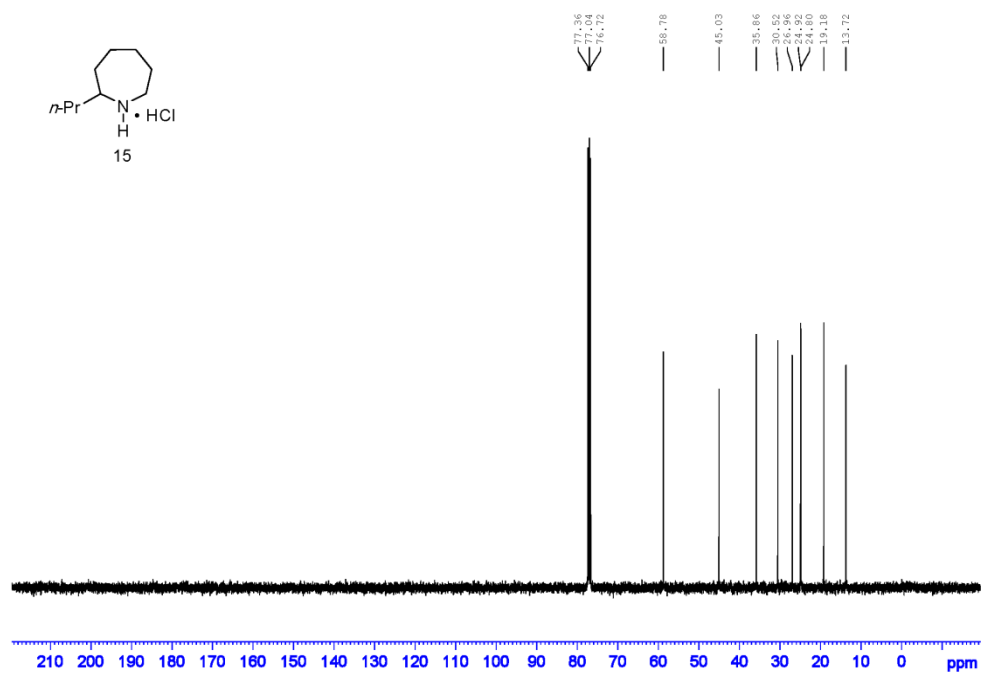

$^1\text{H}$  and  $^{13}\text{C}$  NMR spectra of compound **17**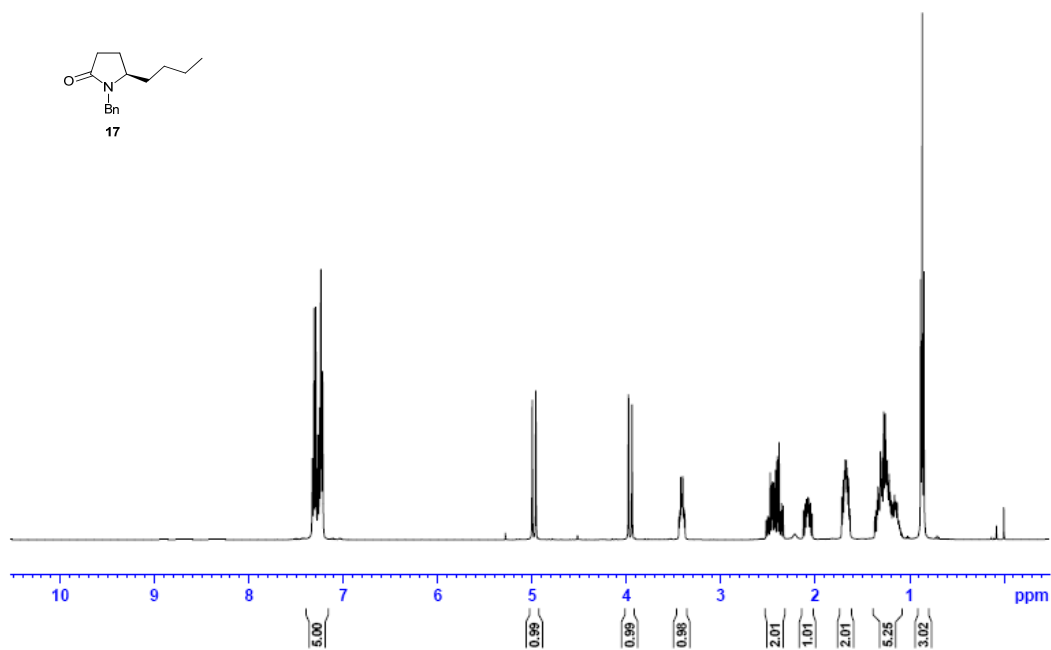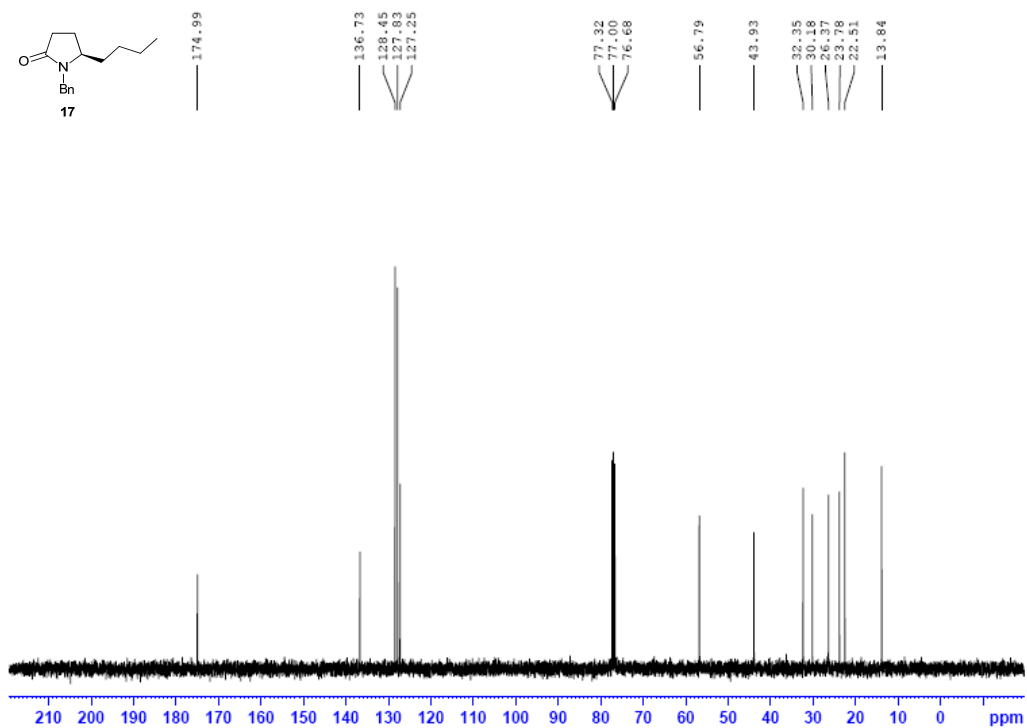

$^1\text{H}$  and  $^{13}\text{C}$  NMR spectra of compound **8**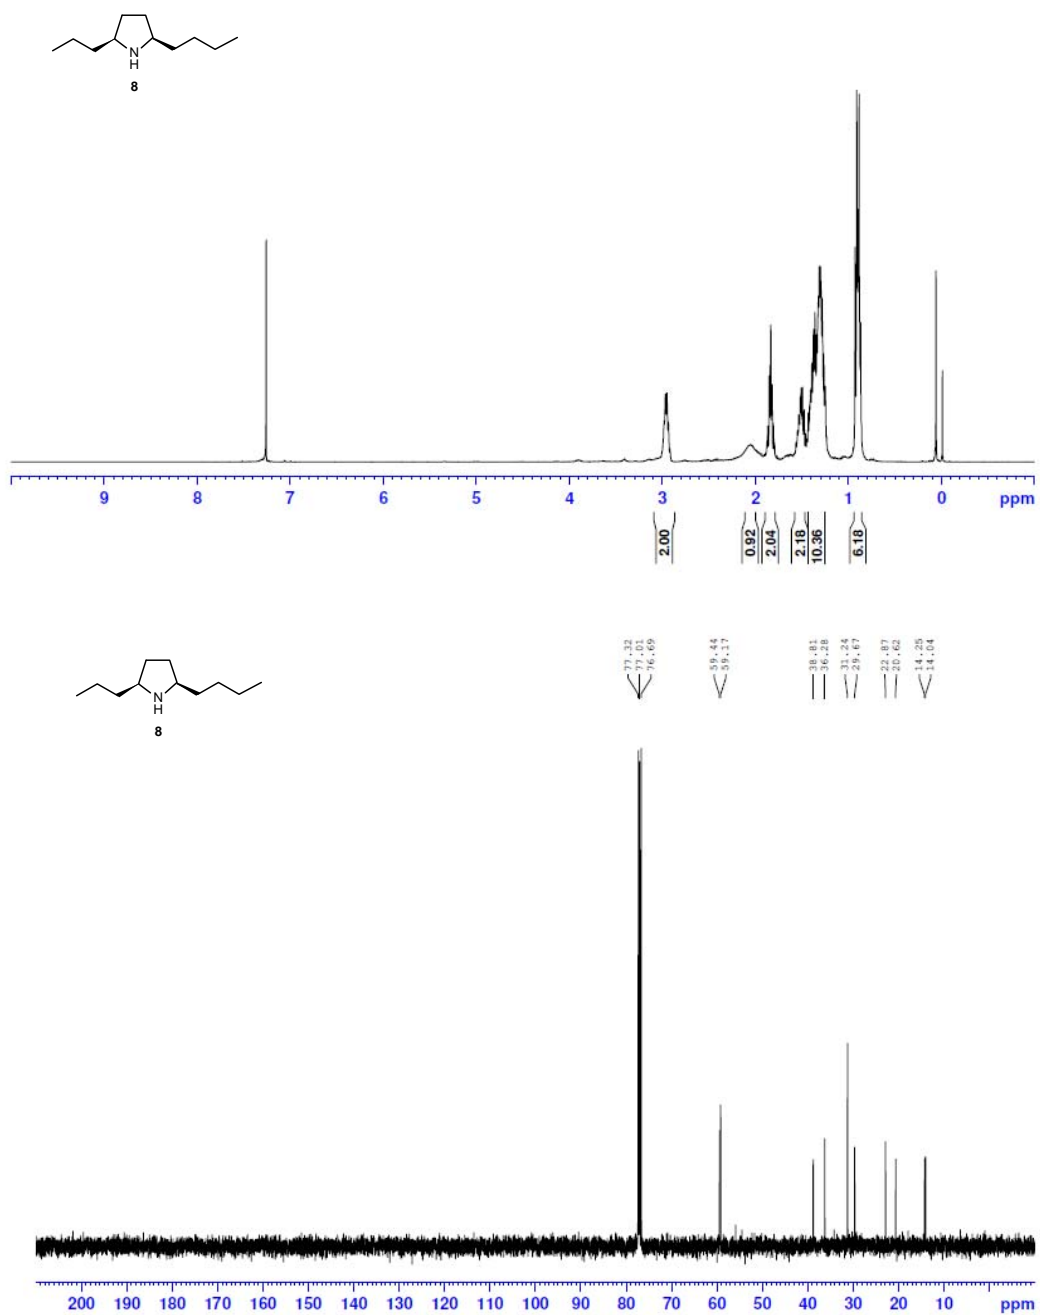

$^1\text{H}$  and  $^{13}\text{C}$  NMR spectra of compound **19**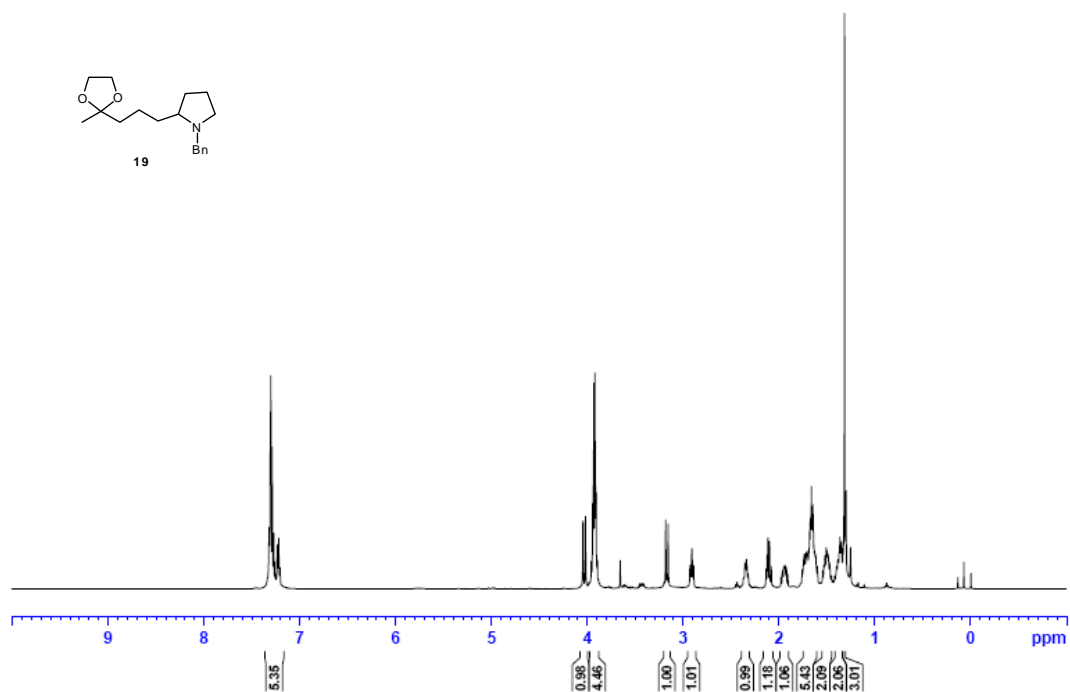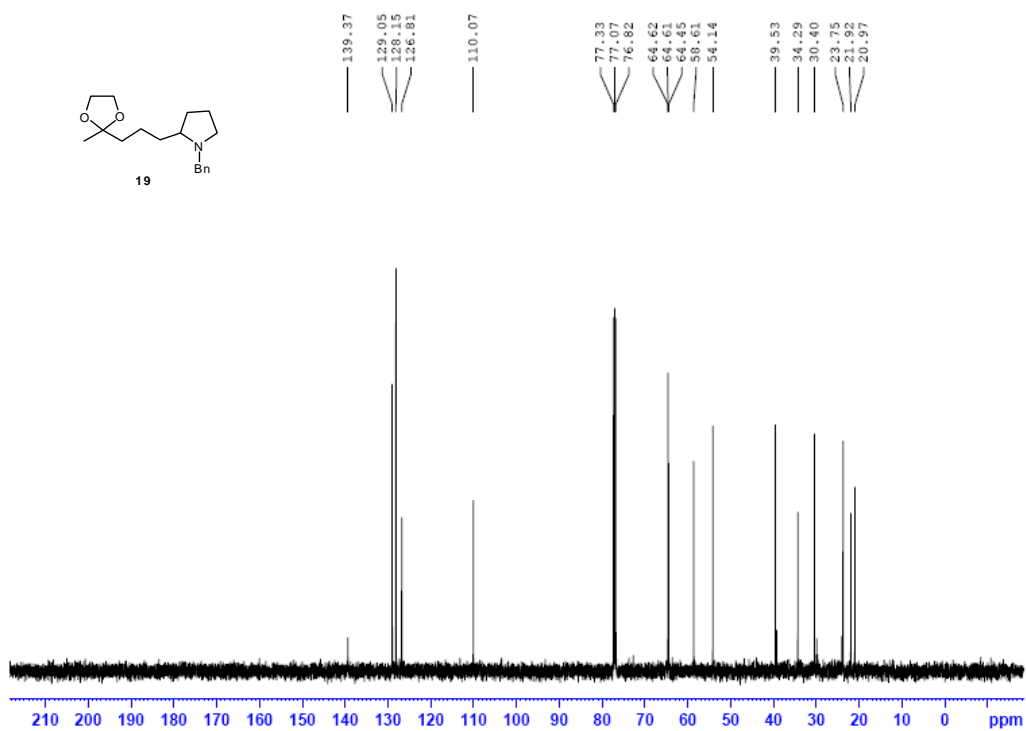

$^1\text{H}$  and  $^{13}\text{C}$  NMR spectra of compound **20**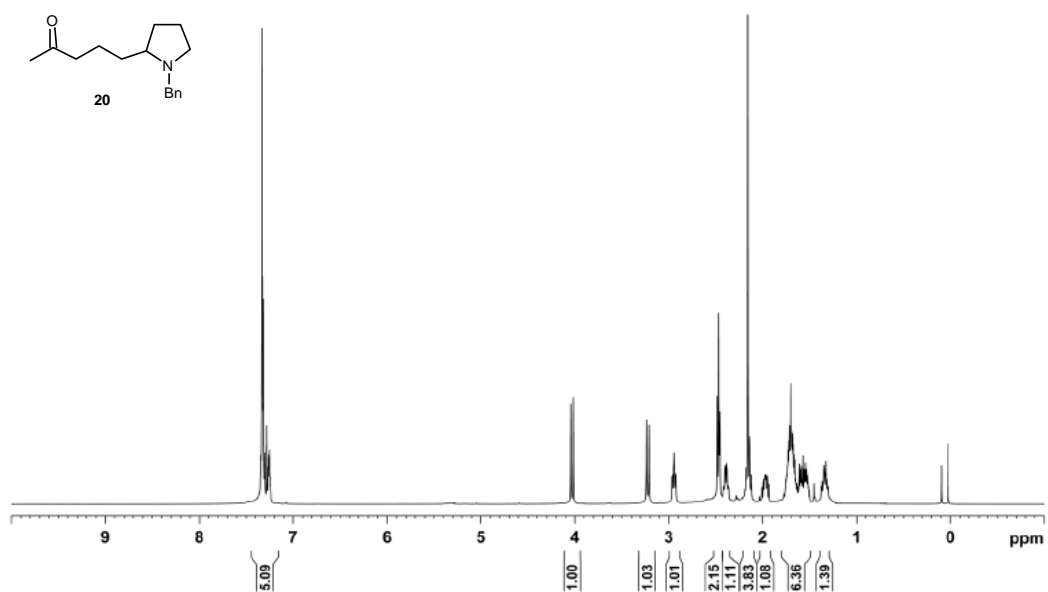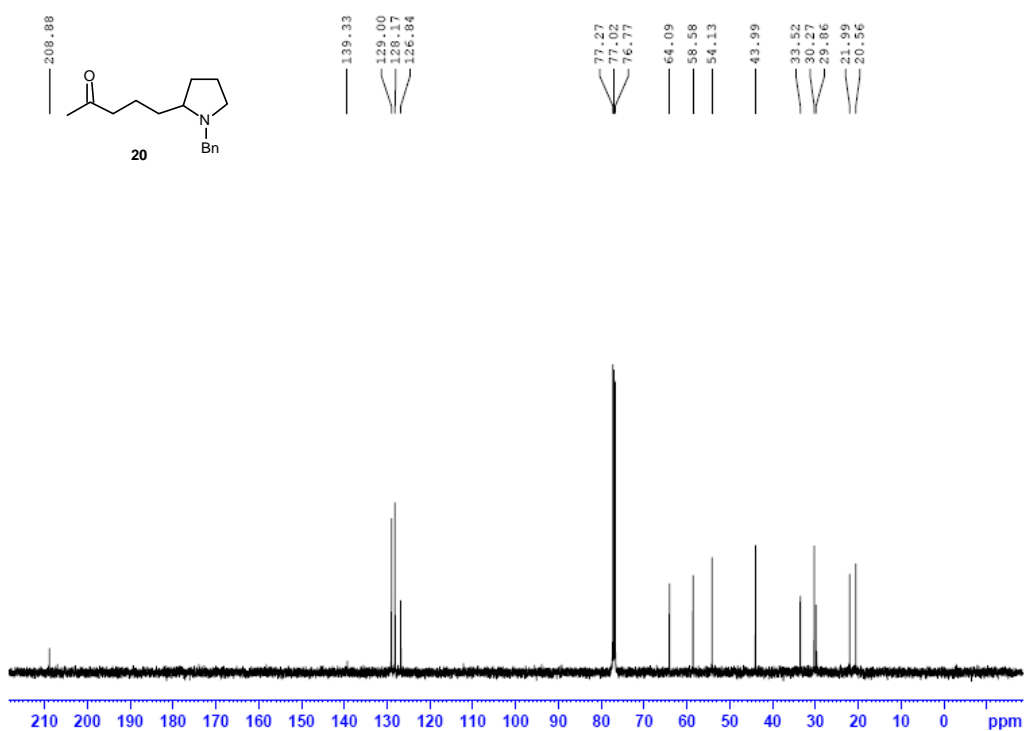



$^1\text{H}$  and  $^{13}\text{C}$  NMR spectra of compound **21**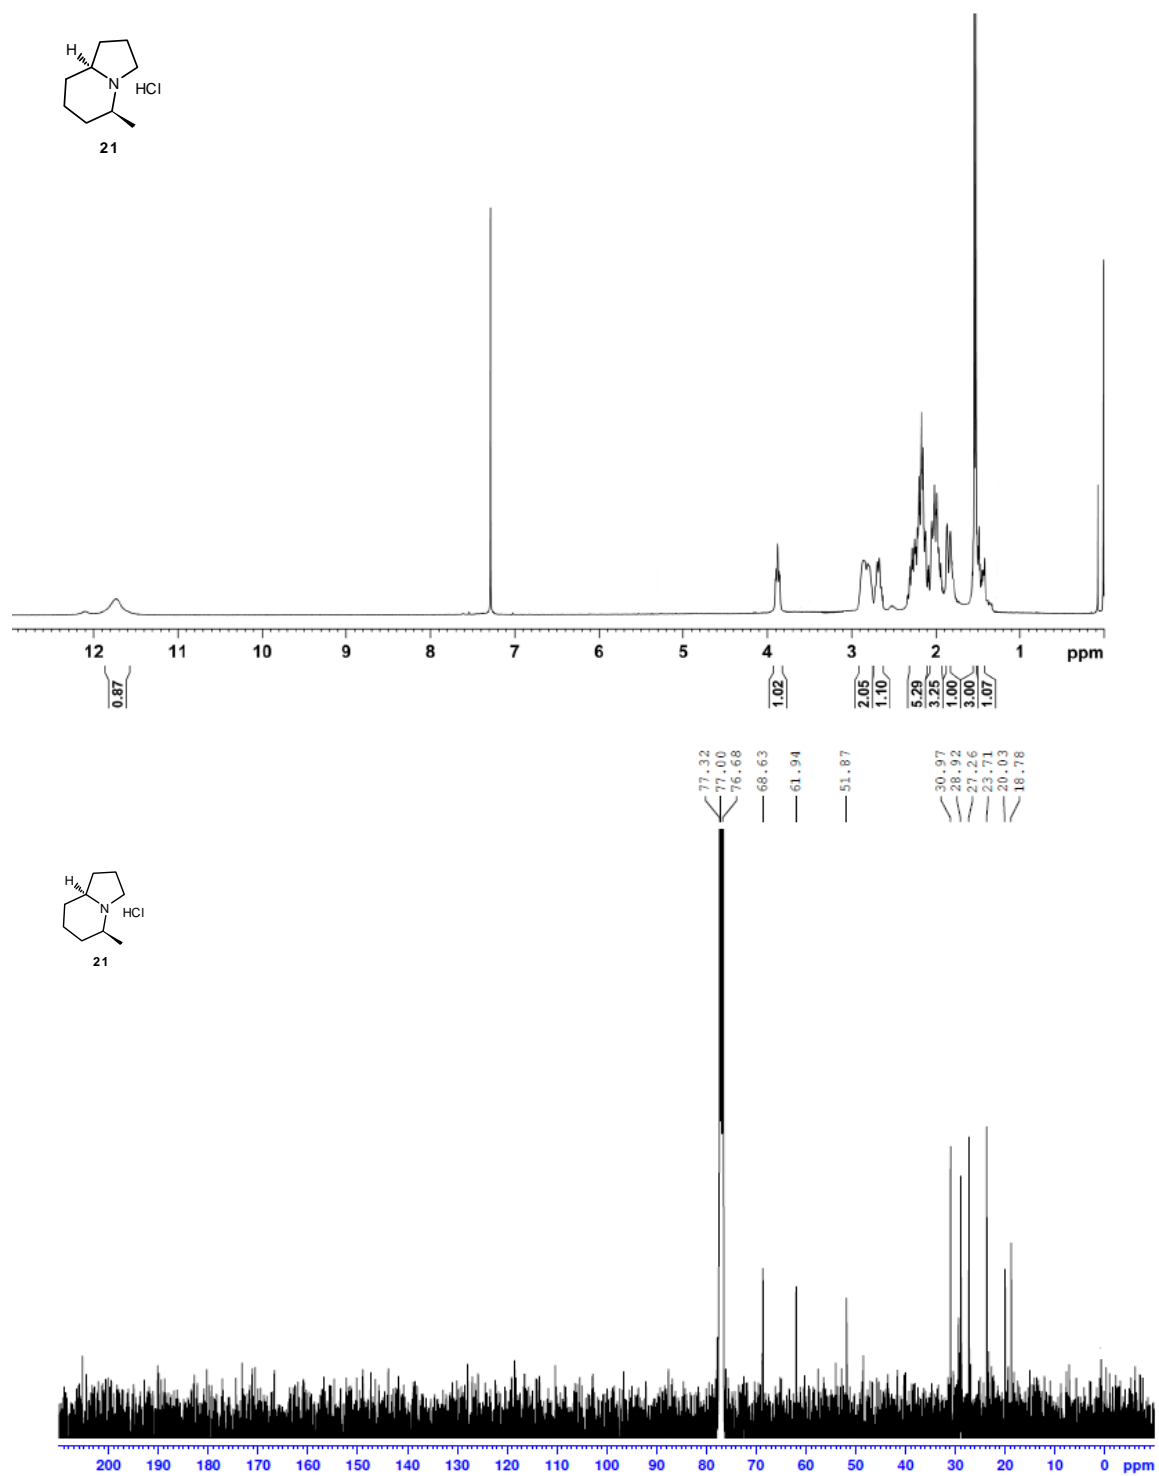

$^1\text{H}$  and  $^{13}\text{C}$  NMR spectra of compound **10**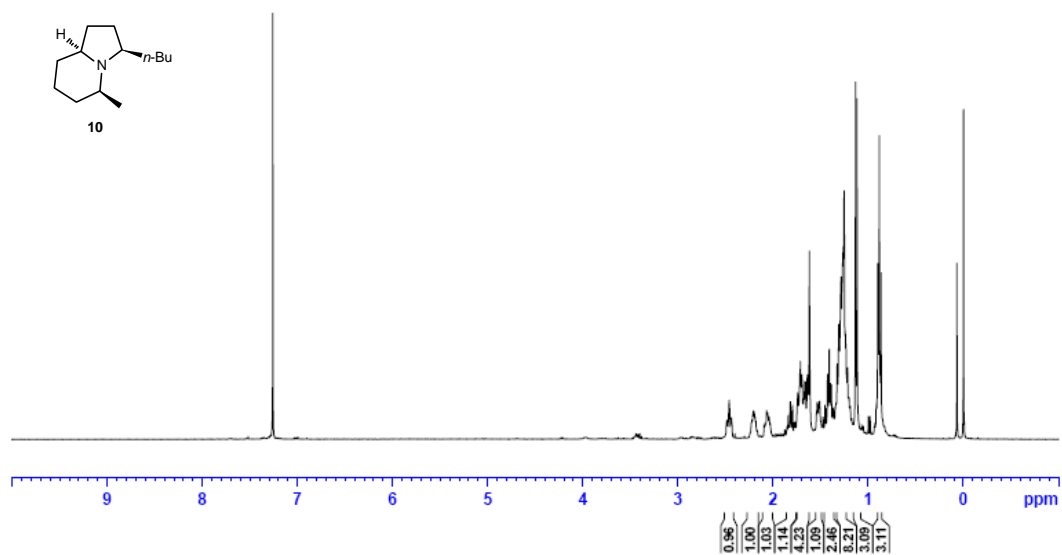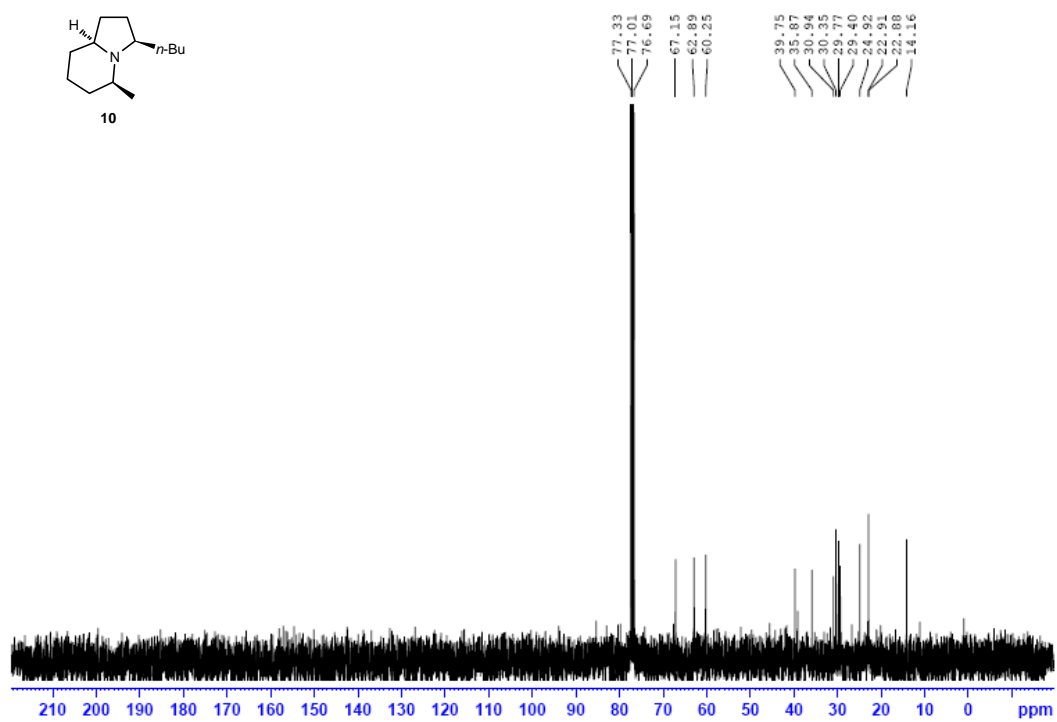

$^{13}\text{C}$  NMR DEPT135 spectrum of compound **10**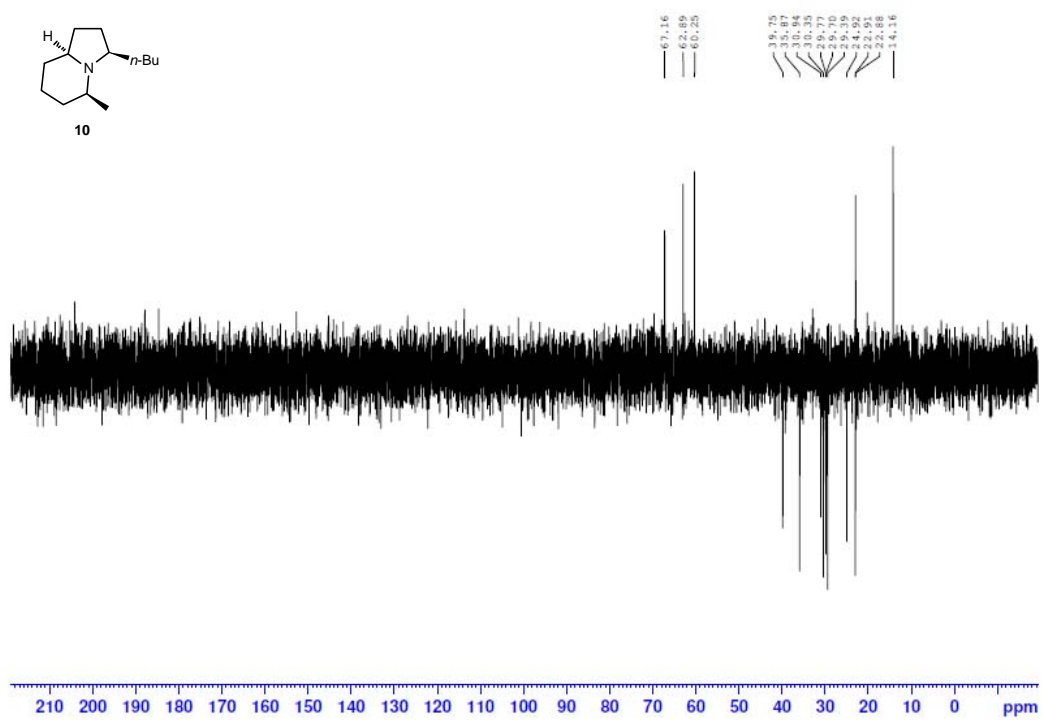

Supplement: c3qo00065f1.pdf [file c3qo00065f1.pdf]
